# Supplementary material for: Response mechanism of mine-isolated fungus Aspergillus niger IOC 4687 to copper stress determined by proteomics
Source: Royal Society of Chemistry journal article supplement (doi:10.1039/c9mt00137a), 2019-09-01
Supplement: c9mt00137a1.xlsx [file c9mt00137a1.xlsx]

## Sheet: Results
	Sample	Concentration (mg/L)																Observações gerais:
		Ag	Al	Ca	Cd	Co	Cr	Cu	Fe	K	Mg	Mn	Na	Ni	Pb	Zn		1- Os números entre parênteses ao lado do nome de cada aba de comprimento de onda indicam a ordem de preferência determinada pelo próprio software. Leva em conta a intensidade de sinal e a presença de interferentes. A sequência das abas para cada elemento, indicam a preferência em termos dos resultados analisados.
	Culture medium	n.d.	n.d.	<1,07	n.d.	n.d.	<0,518	n.d.	<1,10	dil. 5x	dil. 5x	<2,00	dil. 5x	n.d.	n.d.	<1,07
	n.d. = not detected																	2- Os valores em verde, na tabela, indicam que, em alguma diluição a amostra caiu dentro da curva de calibração e seu valor foi assumido como sendo o resultado final. Os valores em azul indicam que a amostra, em alguma diluição, ficou um pouco abaixo ou acima da curva de calibração. Os valores em vermelho indicam que a amostra, em todas as diluições, ficou fora da curva de calibração. Os valores …
	T.Q. = undiluted sample ("tal e qual")
																		3- As amostras em água-régia e outros ácidos concentrados e/ou viscosos dificultam a análise e geram replicatas de leituras mais variáveis entre si e menos confiáveis.
																		4- Nos casos em que o resultado da amostra foi inferior ao menor valor da curva de calibração para o menor fator de diluição utilizado, estimei, pela intensidade se, caso a amostra bruta (sem diluição) fosse lida, seu valor conseguiria ficar dentro da curva. Ou seja, se a intensidade estimada da amostra sem diluição (T.Q.) cair na curva, recomendo fazer a leitura dela ("tal e qual", T.Q.); se a e…

## Sheet: Ag 328,068nm (1)
	Análise realizada em 14ago19
		Ag 328,068nm
		Padrões em HNO3 3% - Sol. A, feitos em 21mai19.
		Padrão	Concentração (mg/L)	Intensidade (cps)	Intensidade corrigida (cps)
		Branco	-	114.414	-
		Mix 2-1	0.518794	14096.2	13981.8
		Mix 2-2	1.00843	25038.9	24924.5
		Mix 2-3	1.99719	51438.2	51323.8
		Mix 2-4	3.00546	81479.1	81364.7
		Mix 2-5	4.00134	105012	104898
		Mix 2-6	4.9881	136223	136109
		Amostra	Intensidade (cps)	Intensidade corrigida (cps)	Concentração (mg/L)	Fator de diluição	Concentração final (mg/L)	Observação
		Meio de cultivo	65.7822	65.7822	0.0687294	1	n.d.	Não detectado.

## Sheet: Al 396,152nm (1)
	Análise realizada em 14ago19
		Al 396,152nm
		Padrões em HNO3 3% - Sol. B, feitos em 31jul19.
		Padrão	Concentração (mg/L)	Intensidade (cps)	Intensidade corrigida (cps)
		Branco	-	487.161	-
		Mix 1-1	1.04653	23558.6	23071.4
		Mix 1-2	4.02612	85498.8	85011.6
		Mix 1-3	8.15885	166462	165975
		Mix 1-4	13.0895	262952	262465
		Mix 1-5	17.011	334134	333647
		Mix 1-6	20.2099	386333	385846
		Amostra	Intensidade (cps)	Intensidade corrigida (cps)	Concentração (mg/L)	Fator de diluição	Concentração final (mg/L)	Observação
		Meio de cultivo	360.277	360.277	-0.255934	1	n.d.	Não detectado.

## Sheet: Ca 396,847nm (1)
	Análise realizada em 14ago19
		Ca 396,847nm
		Padrões em HNO3 3% - Sol. B, feitos em 31jul19.
		Padrão	Concentração (mg/L)	Intensidade (cps)	Intensidade corrigida (cps)
		Branco	-	315858	-
		Mix 1-1	1.06536	1892170	1576312
		Mix 1-2	2.13219	3388050	3072192
		Mix 1-3	4.03305	5898700	5582842
		Mix 1-4	6.00912	8359080	8043222
		Mix 1-5	8.07408	10711300	10395442
		Mix 1-6	9.99638	11342800	11026942
		Amostra	Intensidade (cps)	Intensidade corrigida (cps)	Concentração (mg/L)	Fator de diluição	Concentração final (mg/L)	Observação
		Meio de cultivo	1090870	1090870	0.576423	1	<1,07	Abaixo do menor ponto da curva de calibração.

## Sheet: Cd 214,439nm (1)
	Análise realizada em 14ago19
		Cd 214,439nm
		Padrões em HNO3 3% - Sol. A, feitos em 21mai19.
		Padrão	Concentração (mg/L)	Intensidade (cps)	Intensidade corrigida (cps)
		Branco	-	11.4073	-
		Mix 2-1	0.515896	8133.19	8121.78
		Mix 2-2	1.0028	16274.8	16263.4
		Mix 2-3	1.98604	32129.6	32118.2
		Mix 2-4	2.98867	48070.5	48059.1
		Mix 2-5	3.97899	63733.7	63722.3
		Mix 2-6	4.96024	77875.5	77864.1
		Amostra	Intensidade (cps)	Intensidade corrigida (cps)	Concentração (mg/L)	Fator de diluição	Concentração final (mg/L)	Observação
		Meio de cultivo	10.4277	10.4277	-0.0313976	1	n.d.	Não detectado.

## Sheet: Co 228,615nm (2)
	Análise realizada em 14ago19
		Co 228,615nm
		Padrões em HNO3 3% - Sol. B, feitos em 31jul19.
		Padrão	Concentração (mg/L)	Intensidade (cps)	Intensidade corrigida (cps)
		Branco	-	23.0023	-
		Mix 1-1	0.504402	4333.79	4310.79
		Mix 1-2	1.08175	9064.82	9041.82
		Mix 1-3	2.04088	16994.5	16971.5
		Mix 1-4	3.09265	25061.9	25038.9
		Mix 1-5	4.02548	32655.8	32632.8
		Mix 1-6	5.0509	39869.1	39846.1
		Amostra	Intensidade (cps)	Intensidade corrigida (cps)	Concentração (mg/L)	Fator de diluição	Concentração final (mg/L)	Observação
		Meio de cultivo	37.9059	37.9059	-0.0744819	1	n.d.	Não detectado.

## Sheet: Cr 267,716nm (1)
	Análise realizada em 14ago19
		Cr 267,716nm
		Padrões em HNO3 3% - Sol. A, feitos em 21mai19.
		Padrão	Concentração (mg/L)	Intensidade (cps)	Intensidade corrigida (cps)
		Branco	-	46.3754	-
		Mix 2-1	0.518014	16812.9	16766.5
		Mix 2-2	1.00692	33624.4	33578
		Mix 2-3	1.99419	65491.6	65445.2
		Mix 2-4	3.00094	98911.4	98865
		Mix 2-5	3.99533	131399	131353
		Mix 2-6	4.98061	160136	160090
		Amostra	Intensidade (cps)	Intensidade corrigida (cps)	Concentração (mg/L)	Fator de diluição	Concentração final (mg/L)	Observação
		Meio de cultivo	121.981	121.981	-0.0258452	1	<0,518	Abaixo do menor ponto da curva de calibração.

## Sheet: Cu 327,395nm (1)
	Análise realizada em 14ago19
		Cu 327,395nm
		Padrões em HNO3 3% - Sol. B, feitos em 31jul19.
		Padrão	Concentração (mg/L)	Intensidade (cps)	Intensidade corrigida (cps)
		Branco	-	114.752	-
		Mix 1-1	1.02468	22347.5	22232.7
		Mix 1-2	3.99819	83890.2	83775.4
		Mix 1-3	8.03766	167535	167420
		Mix 1-4	13.136	268188	268073
		Mix 1-5	17.0611	341260	341145
		Mix 1-6	20.0122	401420	401305
		Amostra	Intensidade (cps)	Intensidade corrigida (cps)	Concentração (mg/L)	Fator de diluição	Concentração final (mg/L)	Observação
		Meio de cultivo	100.119	100.119	-0.216864	1	n.d.	Não detectado.

## Sheet: Fe 238,204nm (1)
	Análise realizada em 14ago19
		Fe 238,204nm
		Padrões em HNO3 3% - Sol. B, feitos em 31jul19.
		Padrão	Concentração (mg/L)	Intensidade (cps)	Intensidade corrigida (cps)
		Branco	-	5400.69	-
		Mix 1-1	1.098	28555.3	23154.6
		Mix 1-2	4.03954	98858.9	93458.2
		Mix 1-3	8.0621	191480	186079
		Mix 1-4	13.1022	302901	297500
		Mix 1-5	17.0592	269104	263703
		Mix 1-6	20.0592	317164	311763
		Amostra	Intensidade (cps)	Intensidade corrigida (cps)	Concentração (mg/L)	Fator de diluição	Concentração final (mg/L)	Observação
		Meio de cultivo	1588.3	1588.3	0.0717777	1	<1,10	Abaixo do menor ponto da curva de calibração.

## Sheet: K 766,491nm (1)
	Análise realizada em 14ago19
		K 766,491nm
		Padrões em HNO3 3% - Sol. B, feitos em 31jul19.
		Padrão	Concentração (mg/L)	Intensidade (cps)	Intensidade corrigida (cps)
		Branco	-	1708.11	-
		Mix 1-1	1.02837	45171.8	43463.7
		Mix 1-2	2.02477	88227.7	86519.6
		Mix 1-3	4.00224	178323	176615
		Mix 1-4	6.02245	278079	276371
		Mix 1-5	8.04602	369944	368236
		Mix 1-6	9.99004	469380	467672
		Amostra	Intensidade (cps)	Intensidade corrigida (cps)	Concentração (mg/L)	Fator de diluição	Concentração final (mg/L)	Observação
		Meio de cultivo	1456100	1456100	30.97	1	>9,99	Acima do maior ponto da curva de calibração.

[truncated: 6 more sheets: Mg 279,553nm (1), Mn 257,610nm (1), Na 589,592nm (1), Ni 231,604nm (1), Pb 220,353nm (1), Zn 213,857nm (1)]
