# Supplementary material for: Response mechanism of mine-isolated fungus Aspergillus niger IOC 4687 to copper stress determined by proteomics
Source: Royal Society of Chemistry journal article supplement (doi:10.1039/c9mt00137a), 2019-09-01
Supplement: c9mt00137a2.pdf [file c9mt00137a2.pdf]

**Supplementary material**

Differentially expressed proteins in *Aspergillus niger* IOC 4687

Table 1: Differentially identified proteins by *A.niger* IOC 4687 fungus mass spectrometry in the absence of Cu<sup>2+</sup> (Uniprot, <http://www.uniprot.org>).

| #Acesso    | -10lgP | Convergência (%) | #Peptídeos | Proteins                                                         |
|------------|--------|------------------|------------|------------------------------------------------------------------|
| A0A117DYT5 | 44342  | 52               | 37         | Cobalamin-independent methionine synthase                        |
| A0A100IED2 | 42355  | 46               | 36         | Elongation factor                                                |
| A0A117DXF8 | 41556  | 34               | 26         | 2-oxoglutarate dehydrogenase E1 component                        |
| A5AB29     | 41030  | 49               | 22         | Glutamate decarboxylase (EC 4.1.1.15)                            |
| A0A117E173 | 34101  | 38               | 22         | Hsp70 chaperone                                                  |
| A0A100IAD1 | 34517  | 25               | 16         | Aminopeptidase C                                                 |
| A0A100IFA7 | 30427  | 22               | 13         | Aconitase family protein                                         |
| A0A124BUR9 | 24060  | 6                | 13         | Glycogen debranching enzyme Gdb1                                 |
| A2QUW9     | 24336  | 38               | 12         | Aspergillus niger contig An10c0020, genomic contig (EC 1.1.1.-)  |
| A2R8S1     | 28850  | 21               | 12         | Aspergillus niger contig An16c0250, genomic contig (EC 3.4.14.-) |
| A0A100IA47 | 25819  | 15               | 12         | Bifunctional purine biosynthesis protein Ade16                   |
| A0A117E141 | 24430  | 45               | 10         | ATP synthase subunit 4, mitochondrial                            |
| G3Y9G5     | 21056  | 11               | 9          | Uncharacterized protein                                          |
| A0A172CE91 | 22513  | 26               | 8          | Translation elongation factor 1-alpha (Fragment)                 |
| A2R7U3     | 20162  | 29               | 7          | Aspergillus niger contig An16c0170, genomic contig (EC 1.1.1.-)  |
| A0A117DZF6 | 30535  | 12               | 7          | ER to Golgi transport protein Yif1                               |
| A0A100IQI4 | 16016  | 11               | 6          | ABC transporter                                                  |
| E2PSQ3     | 19859  | 16               | 6          | Aspergillus niger contig An07c0160, genomic contig               |
| A2R070     | 15895  | 18               | 6          | Aspergillus niger contig An12c0240, genomic contig               |
| G3XNR9     | 15823  | 22               | 6          | Methyltransferase (Fragment)                                     |
| A0A100IUG8 | 17191  | 23               | 6          | Short-chain dehydrogenase/reductase family protein               |
| G3XVV7     | 15865  | 30               | 6          | Uncharacterized protein                                          |
| G3Y3M5     | 18070  | 7                | 6          | Uncharacterized protein                                          |
| G3Y8V4     | 19884  | 12               | 6          | Uncharacterized protein                                          |

|            |       |    |   |                                                                  |
|------------|-------|----|---|------------------------------------------------------------------|
| G3XN30     | 23435 | 41 | 6 | Uncharacterized protein (Fragment)                               |
| G3YG52     | 13410 | 18 | 6 | Uncharacterized protein (Fragment)                               |
| A2QA24     | 19439 | 14 | 5 | Aspergillus niger contig An01c0330, genomic contig               |
| A2QLH0     | 13842 | 14 | 5 | Aspergillus niger contig An06c0070, genomic contig               |
| A2R9C5     | 17031 | 13 | 5 | Aspergillus niger contig An17c0040, genomic contig               |
| A0A124BY94 | 14760 | 29 | 5 | Uncharacterized protein                                          |
| A2QJ58     | 14808 | 6  | 5 | Uncharacterized protein                                          |
| G3XUS2     | 16232 | 5  | 5 | Uncharacterized protein                                          |
| G3YG69     | 13457 | 29 | 5 | Uncharacterized protein (Fragment)                               |
| A2QLN6     | 13543 | 11 | 4 | Aspergillus niger contig An06c0090, genomic contig               |
| A2QSZ5     | 15832 | 14 | 4 | Aspergillus niger contig An09c0020, genomic contig (EC 2.1.1.-)  |
| A2R040     | 16212 | 21 | 4 | Aspergillus niger contig An12c0220, genomic contig               |
| A2R6K2     | 17243 | 17 | 4 | Aspergillus niger contig An16c0010, genomic contig (EC 2.1.1.41) |
| A2R7Q2     | 16451 | 17 | 4 | Aspergillus niger contig An16c0160, genomic contig (EC 2.4.1.83) |
| A0A100IN43 | 11767 | 11 | 4 | Survival factor 1                                                |
| G3XZZ8     | 12283 | 10 | 4 | Uncharacterized protein                                          |
| G3Y0V9     | 14251 | 18 | 4 | V-type proton ATPase subunit                                     |
| A0A124BXJ2 | 9164  | 12 | 3 | 2-amino-3-carboxymuconate-6-semialdehyde decarboxylase           |
| A0A124BUY0 | 17585 | 9  | 3 | 2-methylcitrate dehydratase                                      |
| A0A100ILE8 | 17337 | 14 | 3 | 3-hydroxybutyryl-CoA dehydrogenase                               |
| A2Q988     | 13440 | 11 | 3 | Aspergillus niger contig An01c0250, genomic contig (EC 1.2.1.-)  |
| A2Q9M7     | 14515 | 10 | 3 | Aspergillus niger contig An01c0290, genomic contig               |
| A2QF99     | 8924  | 6  | 3 | Aspergillus niger contig An02c0450, genomic contig               |
| A2QPJ6     | 13181 | 17 | 3 | Aspergillus niger contig An07c0340, genomic contig (EC 3.1.1.45) |
| A2QPK9     | 9380  | 5  | 3 | Aspergillus niger contig An07c0370, genomic contig               |
| A2R469     | 9522  | 12 | 3 | Aspergillus niger contig An14c0200, genomic contig               |
| E2PSW1     | 15301 | 11 | 3 | Aspergillus niger contig An17c0060, genomic contig (EC 2.7.1.20) |
| A2RAC5     | 11531 | 8  | 3 | Aspergillus niger contig An18c0080, genomic contig (EC 1.14.-.-) |

|            |       |    |   |                                                                                                                                                            |
|------------|-------|----|---|------------------------------------------------------------------------------------------------------------------------------------------------------------|
| A0A100IK26 | 19784 | 7  | 3 | Cytochrome P450 monooxygenase                                                                                                                              |
| A0A117DZE0 | 8134  | 9  | 3 | Glutamine synthetase                                                                                                                                       |
| A0A100I2M0 | 8923  | 9  | 3 | Mitochondrial protein import protein Mas5                                                                                                                  |
| P55804     | 13684 | 49 | 3 | NADP(+)-dependent glycerol dehydrogenase (EC 1.1.1.72) (Fragments)                                                                                         |
| G3Y6S2     | 12580 | 2  | 3 | Pre-mRNA splicing helicase                                                                                                                                 |
| G3XPH6     | 9417  | 48 | 3 | Profilin                                                                                                                                                   |
| A0A117E1L4 | 15559 | 12 | 3 | Proteasome component PRE2                                                                                                                                  |
| A0A124BWC0 | 8520  | 5  | 3 | SPX domain protein                                                                                                                                         |
| A0A100IQF6 | 14953 | 9  | 3 | Uncharacterized protein                                                                                                                                    |
| G3XMQ1     | 16611 | 7  | 3 | Uncharacterized protein                                                                                                                                    |
| G3XNM7     | 11762 | 38 | 3 | Uncharacterized protein                                                                                                                                    |
| G3XXV3     | 14109 | 12 | 3 | Uncharacterized protein                                                                                                                                    |
| G3YAH5     | 13996 | 2  | 3 | Uncharacterized protein                                                                                                                                    |
| A0A117E1H1 | 15384 | 4  | 2 | Acetyl-CoA-acetyltransferase                                                                                                                               |
| Q00217     | 14156 | 6  | 2 | Alpha,alpha-trehalose-phosphate synthase [UDP-forming] 2 (EC 2.4.1.15) (Trehalose-6-phosphate synthase) (UDP-glucose-glucosephosphate glucosyltransferase) |
| A2QEV0     | 11465 | 11 | 2 | Altered inheritance of mitochondria protein 24, mitochondrial                                                                                              |
| G3Y3K5     | 7436  | 6  | 2 | Arginase (EC 3.5.3.1)                                                                                                                                      |
| D8FSP0     | 5446  | 9  | 2 | Arylamine N-acetyltransferase 2                                                                                                                            |
| A2QAY4     | 8539  | 3  | 2 | Aspergillus niger contig An01c0400, genomic contig                                                                                                         |
| A2QDZ5     | 8616  | 4  | 2 | Aspergillus niger contig An02c0270, genomic contig                                                                                                         |
| A2QP65     | 7010  | 11 | 2 | Aspergillus niger contig An07c0260, genomic contig (EC 3.5.1.19)                                                                                           |
| A2QUB8     | 12235 | 5  | 2 | Aspergillus niger contig An09c0150, genomic contig (EC 2.6.1.5)                                                                                            |
| A2QUT4     | 8790  | 9  | 2 | Aspergillus niger contig An09c0220, genomic contig (EC 2.5.1.49)                                                                                           |
| A2QV31     | 6375  | 8  | 2 | Aspergillus niger contig An10c0050, genomic contig (EC 2.7.8.23)                                                                                           |
| A2QVE0     | 14178 | 6  | 2 | Aspergillus niger contig An11c0040, genomic contig (EC 3.5.4.3)                                                                                            |
| A2QWZ5     | 7891  | 5  | 2 | Aspergillus niger contig An11c0240, genomic contig (EC 1.14.14.3)                                                                                          |

|            |       |    |   |                                                                                                                                                                                                                                                                                                                                                                         |
|------------|-------|----|---|-------------------------------------------------------------------------------------------------------------------------------------------------------------------------------------------------------------------------------------------------------------------------------------------------------------------------------------------------------------------------|
| A5ABQ5     | 7628  | 3  | 2 | Aspergillus niger contig An11c0340, genomic contig                                                                                                                                                                                                                                                                                                                      |
| A2QYI1     | 11595 | 3  | 2 | Aspergillus niger contig An12c0050, genomic contig (EC 1.14.-.-)                                                                                                                                                                                                                                                                                                        |
| A2R093     | 8994  | 26 | 2 | Aspergillus niger contig An12c0260, genomic contig (EC 6.3.2.19)                                                                                                                                                                                                                                                                                                        |
| A2R0Z5     | 7851  | 2  | 2 | Aspergillus niger contig An12c0350, genomic contig (EC 2.4.1.16)                                                                                                                                                                                                                                                                                                        |
| A2R7M4     | 9894  | 16 | 2 | Aspergillus niger contig An16c0150, genomic contig                                                                                                                                                                                                                                                                                                                      |
| A2RAW5     | 13525 | 19 | 2 | Aspergillus niger contig An18c0160, genomic contig                                                                                                                                                                                                                                                                                                                      |
| A0A100IAI5 | 7751  | 7  | 2 | AT DNA binding protein                                                                                                                                                                                                                                                                                                                                                  |
| A0A100I5M3 | 9296  | 4  | 2 | Autophagy protein Atg20                                                                                                                                                                                                                                                                                                                                                 |
| A0A117E1A3 | 7335  | 2  | 2 | Chitin synthase G                                                                                                                                                                                                                                                                                                                                                       |
| A0A124BXP0 | 9409  | 4  | 2 | Cytochrome P450 alkane hydroxylase                                                                                                                                                                                                                                                                                                                                      |
| A0A100IAY7 | 10332 | 3  | 2 | Glycerol kinase                                                                                                                                                                                                                                                                                                                                                         |
| A0A124BUT2 | 10627 | 6  | 2 | Glyoxylate reductase                                                                                                                                                                                                                                                                                                                                                    |
| A0A117E0Z1 | 14142 | 7  | 2 | Guanine deaminase                                                                                                                                                                                                                                                                                                                                                       |
| G3Y376     | 10223 | 4  | 2 | Imidazoleglycerol phosphate synthase (EC 2.4.2.-) (EC 4.1.3.-)                                                                                                                                                                                                                                                                                                          |
| A0A100IF33 | 7836  | 3  | 2 | Mitochondrial carrier protein                                                                                                                                                                                                                                                                                                                                           |
| A0A100IIK0 | 5442  | 1  | 2 | Pentafunctional AROM polypeptide [Includes: 3-dehydroquinone dehydratase (3-dehydroquinase) (EC 4.2.1.10); 3-dehydroquinone synthase (DHQS) (EC 4.2.3.4); 3-phosphoshikimate 1-carboxyvinyltransferase (EC 2.5.1.19) (5-enolpyruvylshikimate-3-phosphate synthase) (EPSP synthase) (EPSPS); Shikimate dehydrogenase (EC 1.1.1.25); Shikimate kinase (SK) (EC 2.7.1.71)] |
| G3YHN0     | 4955  | 2  | 2 | Pentafunctional AROM polypeptide [Includes: 3-dehydroquinone dehydratase (3-dehydroquinase) (EC 4.2.1.10); 3-dehydroquinone synthase (DHQS) (EC 4.2.3.4); 3-phosphoshikimate 1-carboxyvinyltransferase (EC 2.5.1.19) (5-enolpyruvylshikimate-3-phosphate synthase) (EPSP synthase) (EPSPS); Shikimate dehydrogenase (EC 1.1.1.25); Shikimate kinase (SK) (EC 2.7.1.71)] |
| G3Y6C3     | 7253  | 13 | 2 | Phosphoglycerate mutase (EC 5.4.2.-)                                                                                                                                                                                                                                                                                                                                    |
| A2QHM1     | 9657  | 8  | 2 | Protein transport protein sec13                                                                                                                                                                                                                                                                                                                                         |
| A0A100IBY6 | 7675  | 2  | 2 | PT repeat family protein                                                                                                                                                                                                                                                                                                                                                |

|            |       |    |   |                                                                                               |
|------------|-------|----|---|-----------------------------------------------------------------------------------------------|
| A0A100INZ0 | 12228 | 19 | 2 | Rho GDP-dissociation inhibitor                                                                |
| G3Y1A2     | 11186 | 4  | 2 | Serine/threonine-protein phosphatase 2A 56 kDa regulatory subunit                             |
| A0A100IGK5 | 11015 | 8  | 2 | Short-chain dehydrogenases/reductase                                                          |
| G3Y384     | 11607 | 4  | 2 | Ubiquitinyl hydrolase 1 (EC 3.4.19.12)                                                        |
| A0A117DWH9 | 9675  | 4  | 2 | Uncharacterized protein                                                                       |
| A0A124BYS2 | 11374 | 3  | 2 | Uncharacterized protein                                                                       |
| G3XPL1     | 4939  | 2  | 2 | Uncharacterized protein                                                                       |
| G3Y1D3     | 7777  | 2  | 2 | Uncharacterized protein                                                                       |
| G3YBW1     | 13660 | 7  | 2 | Uncharacterized protein                                                                       |
| G3XVI7     | 5197  | 13 | 2 | Uncharacterized protein (Fragment)                                                            |
| G3Y1T0     | 9354  | 1  | 2 | Uncharacterized protein (Fragment)                                                            |
| A0A100IRD4 | 3450  | 4  | 1 | 2,4-dihydroxyhept-2-ene-1,7-dioic acid aldolase                                               |
| A0A100IJM4 | 4447  | 3  | 1 | 3'(2'),5'-bisphosphate nucleotidase                                                           |
| G3YDC2     | 4562  | 7  | 1 | 30kD heat shock protein                                                                       |
| A2QCE1     | 6484  | 2  | 1 | 3-isopropylmalate dehydratase (EC 4.2.1.33) (Alpha-IPM isomerase) (Isopropylmalate isomerase) |
| A0A100IIB7 | 8173  | 4  | 1 | 3-ketoacyl-CoA ketothiolase                                                                   |
| A0A117E4B2 | 8964  | 4  | 1 | 3-ketoacyl-CoA thiolase                                                                       |
| A0A100IB61 | 4838  | 3  | 1 | 3-ketoacyl-coA thiolase peroxisomal A                                                         |
| A0A124BWJ7 | 3803  | 1  | 1 | 3-methylcrotonyl-CoA carboxylase subunit alpha                                                |
| A0A100ICL4 | 6905  | 2  | 1 | 6-phosphofructo-2-kinase 1                                                                    |
| A0A100IJH8 | 8847  | 3  | 1 | AAA family ATPase                                                                             |
| A0A100ICU6 | 3477  | 1  | 1 | ABC transporter                                                                               |
| A0A100IST5 | 6953  | 2  | 1 | Acetolactate synthase                                                                         |
| A0A124BZ14 | 5028  | 4  | 1 | Actin-bundling protein Sac6                                                                   |
| A0A117E1J6 | 4019  | 6  | 1 | ADP-ribose pyrophosphatase                                                                    |

|            |       |   |   |                                                                  |
|------------|-------|---|---|------------------------------------------------------------------|
| A0A117DY12 | 3198  | 2 | 1 | Alpha/beta hydrolase                                             |
| A0A100IT77 | 3896  | 2 | 1 | Alpha-ketoglutarate dependent xanthine dioxygenase               |
| A0A100I735 | 4259  | 2 | 1 | Amino adipic semialdehyde synthase                               |
| A0A117DWN7 | 3268  | 4 | 1 | Anthranilate phosphoribosyltransferase                           |
| A0A100IHG1 | 4304  | 1 | 1 | Anucleate primary sterigmata protein A                           |
| A0A100IMZ2 | 4065  | 3 | 1 | Arginase family protein                                          |
| A2Q7C2     | 4484  | 5 | 1 | Aspergillus niger contig An01c0020, genomic contig               |
| A2Q7W4     | 6259  | 4 | 1 | Aspergillus niger contig An01c0080, genomic contig               |
| A2Q878     | 5311  | 6 | 1 | Aspergillus niger contig An01c0100, genomic contig (EC 5.3.3.-)  |
| A2QA94     | 7558  | 3 | 1 | Aspergillus niger contig An01c0330, genomic contig (EC 3.5.2.3)  |
| A2QBA2     | 15111 | 5 | 1 | Aspergillus niger contig An01c0470, genomic contig               |
| A2QCH0     | 3524  | 3 | 1 | Aspergillus niger contig An02c0090, genomic contig               |
| A5AAH4     | 6361  | 2 | 1 | Aspergillus niger contig An02c0310, genomic contig (EC 1.1.2.4)  |
| A2QEN3     | 6491  | 4 | 1 | Aspergillus niger contig An02c0360, genomic contig               |
| A2QGD7     | 7178  | 4 | 1 | Aspergillus niger contig An03c0080, genomic contig               |
| A2QGV0     | 3710  | 6 | 1 | Aspergillus niger contig An03c0130, genomic contig               |
| A2QHC2     | 5183  | 1 | 1 | Aspergillus niger contig An03c0200, genomic contig (EC 2.4.1.16) |
| A2QHU7     | 3660  | 4 | 1 | Aspergillus niger contig An04c0070, genomic contig               |
| A2QIG3     | 4466  | 3 | 1 | Aspergillus niger contig An04c0140, genomic contig               |
| A2QIL1     | 7092  | 2 | 1 | Aspergillus niger contig An04c0140, genomic contig               |
| A2QMT8     | 8564  | 4 | 1 | Aspergillus niger contig An07c0080, genomic contig               |
| A2QMV4     | 6618  | 2 | 1 | Aspergillus niger contig An07c0080, genomic contig               |
| A2QMW7     | 8395  | 5 | 1 | Aspergillus niger contig An07c0090, genomic contig (EC 1.1.1.-)  |
| A2QMY3     | 3282  | 2 | 1 | Aspergillus niger contig An07c0100, genomic contig               |
| A2QPA1     | 8536  | 1 | 1 | Aspergillus niger contig An07c0300, genomic contig               |
| A2QPL2     | 4663  | 4 | 1 | Aspergillus niger contig An07c0370, genomic contig               |
| A2QQR8     | 3750  | 2 | 1 | Aspergillus niger contig An08c0100, genomic contig (EC 3.4.21.-) |
| A2QRB1     | 8981  | 4 | 1 | Aspergillus niger contig An08c0130, genomic contig (EC 2.3.1.16) |

|            |       |    |   |                                                                              |
|------------|-------|----|---|------------------------------------------------------------------------------|
| A2QTP3     | 3318  | 2  | 1 | Aspergillus niger contig An09c0070, genomic contig                           |
| A2QUW6     | 4982  | 1  | 1 | Aspergillus niger contig An10c0020, genomic contig                           |
| A5ABF6     | 5734  | 2  | 1 | Aspergillus niger contig An11c0010, genomic contig                           |
| A2QVT6     | 8488  | 6  | 1 | Aspergillus niger contig An11c0090, genomic contig                           |
| A2QWF8     | 8209  | 2  | 1 | Aspergillus niger contig An11c0200, genomic contig (Fragment)                |
| A5ABR4     | 4825  | 3  | 1 | Aspergillus niger contig An11c0340, genomic contig                           |
| A2QYN6     | 3300  | 2  | 1 | Aspergillus niger contig An12c0060, genomic contig (EC 2.5.1.29)             |
| A2R0E9     | 12159 | 3  | 1 | Aspergillus niger contig An12c0280, genomic contig (EC 3.4.-.-)              |
| A2R1M5     | 3687  | 2  | 1 | Aspergillus niger contig An13c0060, genomic contig                           |
| A2R3K0     | 4049  | 1  | 1 | Aspergillus niger contig An14c0160, genomic contig                           |
| A2R3M8     | 3285  | 1  | 1 | Aspergillus niger contig An14c0170, genomic contig                           |
| A2R3P5     | 4230  | 2  | 1 | Aspergillus niger contig An14c0170, genomic contig                           |
| A2R3T5     | 6436  | 5  | 1 | Aspergillus niger contig An14c0180, genomic contig                           |
| A2R3U3     | 4230  | 2  | 1 | Aspergillus niger contig An14c0180, genomic contig                           |
| A2R424     | 3765  | 2  | 1 | Aspergillus niger contig An14c0190, genomic contig                           |
| A2R5V8     | 5229  | 1  | 1 | Aspergillus niger contig An15c0200, genomic contig                           |
| A2R620     | 3808  | 1  | 1 | Aspergillus niger contig An15c0210, genomic contig                           |
| A2R8L9     | 4274  | 2  | 1 | Aspergillus niger contig An16c0230, genomic contig                           |
| A2R9B0     | 11854 | 6  | 1 | Aspergillus niger contig An17c0030, genomic contig                           |
| A2RB76     | 7983  | 3  | 1 | Aspergillus niger contig An18c0170, genomic contig                           |
| A2QPN1     | 3656  | 14 | 1 | Autophagy-related protein 8 (Autophagy-related ubiquitin-like modifier atg8) |
| A0A100ILA6 | 4933  | 3  | 1 | BNR/Asp-box repeat protein                                                   |
| A0A100IBT0 | 6822  | 3  | 1 | Branched-chain amino acid aminotransferase                                   |
| A0A117DZ96 | 6696  | 3  | 1 | Calcium/calmodulin-dependent protein kinase                                  |
| G3Y5W3     | 4845  | 1  | 1 | cAMP-dependent protein kinase regulatory subunit                             |
| A2QKY5     | 3571  | 2  | 1 | Carboxypeptidase (EC 3.4.16.-)                                               |
| A0A100INJ4 | 4470  | 2  | 1 | CBS domain protein                                                           |



|            |       |   |   |                                                                                |
|------------|-------|---|---|--------------------------------------------------------------------------------|
| A0A100IP67 | 10485 | 4 | 1 | Chitin synthase activator                                                      |
| T1SGS1     | 7370  | 3 | 1 | Citrate synthase (Fragment)                                                    |
| A0A0H5ARK2 | 5654  | 6 | 1 | Citrate transport protein (Mitochondrial tricarboxylate transporter)           |
| A0A100IKL7 | 3675  | 2 | 1 | CMGC/SRPK protein kinase                                                       |
| A0A117DXV8 | 4594  | 6 | 1 | Coiled-coil domain-containing protein                                          |
| A0A124BWT6 | 4742  | 2 | 1 | Cyanate hydratase (Cyanase) (EC 4.2.1.104) (Cyanate hydrolase) (Cyanate lyase) |
| A0A100IAM4 | 7092  | 1 | 1 | Dead box ATP-dependent rna helicase                                            |
| G3Y417     | 8674  | 4 | 1 | Decarboxylase yanB (EC 4.1.1.-) (Yanuthone D synthesis protein B)              |
| G3XN75     | 4707  | 5 | 1 | Dehydrogenase                                                                  |
| A2QAJ5     | 5625  | 4 | 1 | Dipeptidase (EC 3.4.13.19)                                                     |
| G3XMY2     | 7405  | 1 | 1 | DNA helicase (EC 3.6.4.12)                                                     |
| A0A117DXI6 | 3456  | 1 | 1 | DNA polymerase epsilon subunit C                                               |
| A0A100ITR6 | 6887  | 4 | 1 | DnaJ domain protein                                                            |
| A0A117E1K1 | 5384  | 3 | 1 | Endo-1,3-beta-glucanase eglC                                                   |
| A0A124BWC6 | 4232  | 9 | 1 | ER-derived vesicles protein ERV14                                              |
| A0A100IJ67 | 6664  | 3 | 1 | Fe-containing alcohol dehydrogenase                                            |
| A0A100INL7 | 5856  | 8 | 1 | Fumarylacetoacetate hydrolase family protein                                   |
| A0A100I3X8 | 3440  | 3 | 1 | Gamma-glutamyltranspeptidase                                                   |
| A0A100IPJ9 | 5786  | 5 | 1 | GDSL lipase/acylhydrolase family protein                                       |
| A0A100I6Y8 | 3675  | 3 | 1 | Glucooligosaccharide oxidase                                                   |
| G3Y3M0     | 8507  | 5 | 1 | Homoserine dehydrogenase (HDH) (EC 1.1.1.3)                                    |
| A0A100IH16 | 8444  | 6 | 1 | Imidazoleglycerol-phosphate dehydratase                                        |
| E2PSZ3     | 4726  | 2 | 1 | IMP-specific 5'-nucleotidase 1 (EC 3.1.3.-)                                    |
| A0A100IU80 | 8320  | 5 | 1 | Inorganic diphosphatase                                                        |
| G3XMB9     | 3642  | 3 | 1 | Ketoreductase azaE (EC 1.-.-) (Azaphilone biosynthesis cluster protein azaE)   |
| A0A100I9T7 | 3660  | 3 | 1 | Kinase-related protein                                                         |

|            |      |   |   |                                                                                                         |
|------------|------|---|---|---------------------------------------------------------------------------------------------------------|
| A0A100IB39 | 7093 | 3 | 1 | Kynurenine aminotransferase                                                                             |
| A0A100IPR3 | 7964 | 3 | 1 | Lysosomal protective protein                                                                            |
| A0A100IGU3 | 7653 | 2 | 1 | Mannosyl-oligosaccharide glucosidase                                                                    |
| A0A117E128 | 3847 | 2 | 1 | Metabolite transport protein                                                                            |
| G3XLM4     | 6559 | 2 | 1 | Methylenetetrahydrofolate reductase (EC 1.5.1.20)                                                       |
| A0A100IGC7 | 7893 | 5 | 1 | Monothiol glutaredoxin-4                                                                                |
| A0A117DY30 | 8155 | 2 | 1 | mRNA splicing factor                                                                                    |
| A0A100INU6 | 7316 | 2 | 1 | NADH-ubiquinone oxidoreductase 64 kDa subunit                                                           |
| A0A117E493 | 7020 | 2 | 1 | Nitrogen assimilation transcription factor NirA                                                         |
| G3Y421     | 7258 | 4 | 1 | O-Mevalon transferase yanI (EC 2.-.-) (Yanuthone D synthesis protein I)                                 |
| A0A100IJZ0 | 5235 | 3 | 1 | Oxidoreductase                                                                                          |
| A0A100I9K6 | 8329 | 5 | 1 | Peptide alpha-N-acetyltransferase Nat2                                                                  |
| A0A100IL90 | 3425 | 1 | 1 | Phosphatidylinositol 3-kinase Tor2                                                                      |
| A0A100ILE0 | 4141 | 4 | 1 | Phosphoglycerate mutase                                                                                 |
| A0A117DUZ4 | 5037 | 4 | 1 | Phosphoserine phosphatase                                                                               |
| A0A100IJ11 | 8488 | 2 | 1 | Plasma membrane antiporter                                                                              |
| A2RBC2     | 3468 | 2 | 1 | Probable carboxypeptidase An18g06210 (EC 3.4.17.-) (Peptidase M20 domain-containing protein An18g06210) |
| A2RA98     | 3783 | 1 | 1 | Protein kinase C (EC 2.7.11.13)                                                                         |
| Q00078     | 4985 | 1 | 1 | Protein kinase C-like (EC 2.7.11.13)                                                                    |
| A0A117E2X4 | 3555 | 3 | 1 | RNA-splicing protein MRS3                                                                               |
| A0A100IUG1 | 7195 | 2 | 1 | Ser/Thr protein phosphatase family                                                                      |
| A0A117E3Q4 | 3197 | 4 | 1 | SH3 domain protein                                                                                      |
| A0A100I2E9 | 4025 | 2 | 1 | Siderophore biosynthesis protein                                                                        |
| Q00179     | 4189 | 2 | 1 | Signal recognition particle 54 kDa protein homolog                                                      |
| A2QJF4     | 6496 | 2 | 1 | Signal recognition particle subunit SRP72                                                               |
| A0A124BV10 | 6349 | 4 | 1 | Similar to An02g04850                                                                                   |

|            |      |    |   |                                                |
|------------|------|----|---|------------------------------------------------|
| A0A100IKI6 | 4801 | 6  | 1 | Small nuclear ribonucleoprotein U2, A          |
| A0A100II23 | 4026 | 5  | 1 | Suppressor/enhancer of lin-12 protein 9        |
| A0A100IK93 | 3143 | 1  | 1 | Transporter mch1                               |
| A0A124BWL4 | 9366 | 5  | 1 | tRNA methyltransferase subunit GCD14           |
| A2QTW3     | 3550 | 13 | 1 | U6 snRNA-associated Sm-like protein LSm2       |
| A0A117DX56 | 3348 | 2  | 1 | Ubiquitin fusion degradation protein UfdB      |
| A0A100IGC5 | 9992 | 1  | 1 | Uncharacterized protein                        |
| A0A100IRC0 | 4230 | 2  | 1 | Uncharacterized protein                        |
| A0A100ITS4 | 4960 | 0  | 1 | Uncharacterized protein                        |
| A0A117E225 | 7857 | 15 | 1 | Uncharacterized protein                        |
| A2R2V5     | 3201 | 5  | 1 | Uncharacterized protein                        |
| G3XTD1     | 6203 | 1  | 1 | Uncharacterized protein                        |
| G3XU92     | 3368 | 2  | 1 | Uncharacterized protein                        |
| G3XVP9     | 4660 | 2  | 1 | Uncharacterized protein                        |
| G3XY19     | 9992 | 4  | 1 | Uncharacterized protein                        |
| G3XZP8     | 4366 | 4  | 1 | Uncharacterized protein                        |
| G3Y822     | 5546 | 14 | 1 | Uncharacterized protein                        |
| G3YAF7     | 3379 | 8  | 1 | Uncharacterized protein                        |
| G3YBM9     | 6027 | 1  | 1 | Uncharacterized protein                        |
| G3YC04     | 8064 | 1  | 1 | Uncharacterized protein                        |
| G3YC44     | 3337 | 1  | 1 | Uncharacterized protein                        |
| G3YFP7     | 4386 | 5  | 1 | Uncharacterized protein                        |
| G3YG83     | 3270 | 0  | 1 | Uncharacterized protein                        |
| G3YHM6     | 3451 | 0  | 1 | Uncharacterized protein                        |
| G3XVT5     | 4785 | 1  | 1 | Uncharacterized protein (Fragment)             |
| G3Y9V6     | 8329 | 10 | 1 | Uncharacterized protein (Fragment)             |
| G3YFM4     | 3535 | 1  | 1 | Uncharacterized protein (Fragment)             |
| A0A100I3G4 | 5317 | 4  | 1 | Vacuolar protein sorting-associated protein 26 |

|            |      |   |   |                                                |
|------------|------|---|---|------------------------------------------------|
| A0A100IHM8 | 3505 | 2 | 1 | Vacuolar protein sorting-associated protein 29 |
| A0A100ING1 | 4359 | 5 | 1 | Vacuolar protein sorting-associated protein 74 |
| A0A100IKX4 | 5523 | 6 | 1 | Xanthine phosphoribosyltransferase 1           |

Table 2: Differentially identified proteins by *A.niger* IOC 4687 fungus mass spectrometry in presence of Cu<sup>2+</sup> (Uniprot, <http://www.uniprot.org>).

| #Acesso    | -10lgP | Convergencia (%) | #Peptideos | Proteinas                                                                                                                   |
|------------|--------|------------------|------------|-----------------------------------------------------------------------------------------------------------------------------|
| G3XZT4     | 39087  | 46               | 25         | Uncharacterized protein                                                                                                     |
| D7GAW3     | 36317  | 57               | 17         | Translation elongation factor 1-alpha (Fragment)                                                                            |
| A0A100INN3 | 26592  | 36               | 14         | 14-3-3 protein                                                                                                              |
| I7B155     | 25053  | 53               | 12         | Calmodulin (Fragment)                                                                                                       |
| A2R121     | 28732  | 39               | 11         | Aspergillus niger contig An12c0380, genomic contig (EC 1.3.1.-)                                                             |
| A0A100IQ03 | 27053  | 35               | 10         | NADH-ubiquinone oxidoreductase 39 kDa subunit                                                                               |
| A2R8G7     | 26480  | 37               | 8          | Aspergillus niger contig An16c0230, genomic contig (EC 1.1.1.100)                                                           |
| A5ABB4     | 21941  | 24               | 7          | Aspergillus niger contig An08c0230, genomic contig (EC 1.1.1.91)                                                            |
| A0A100IPI0 | 17412  | 18               | 7          | Heat shock protein 60                                                                                                       |
| A0A100IU47 | 25347  | 25               | 7          | Norsolorinic acid reductase                                                                                                 |
| A0A124BW23 | 16998  | 14               | 6          | Aminotransferase, classes I and II                                                                                          |
| A0A100IJG5 | 16692  | 18               | 5          | Aflatoxin B1-aldehyde reductase GliO-like                                                                                   |
| A2Q8R5     | 17300  | 19               | 5          | Aspergillus niger contig An01c0190, genomic contig                                                                          |
| A2QYU0     | 17592  | 19               | 5          | Aspergillus niger contig An12c0070, genomic contig (EC 1.3.1.-)                                                             |
| G3XVT2     | 21786  | 12               | 5          | Uncharacterized protein                                                                                                     |
| A2QCS1     | 18715  | 4                | 4          | Aspergillus niger contig An02c0120, genomic contig                                                                          |
| A2QLM3     | 14786  | 8                | 4          | Aspergillus niger contig An06c0090, genomic contig                                                                          |
| A2QN65     | 17996  | 13               | 4          | Aspergillus niger contig An07c0110, genomic contig (EC 1.1.1.-)                                                             |
| A2QW33     | 17009  | 15               | 4          | Aspergillus niger contig An11c0150, genomic contig (EC 1.1.1.195)                                                           |
| A0A117DYG4 | 14373  | 7                | 4          | Eukaryotic translation initiation factor eIF-4A subunit, putative [Aspergillus flavus ATP-dependent RNA helicase FAL1 [Aspe |
| A0A100IAS4 | 22207  | 15               | 4          | Uncharacterized protein                                                                                                     |
| G3XUII     | 16349  | 14               | 4          | Uncharacterized protein                                                                                                     |
| A0A100IMW8 | 12331  | 12               | 3          | Aldo-keto reductase                                                                                                         |

|            |       |    |   |                                                                   |
|------------|-------|----|---|-------------------------------------------------------------------|
| A2QSY9     | 13478 | 14 | 3 | Aspergillus niger contig An09c0020, genomic contig                |
| A2R501     | 11315 | 7  | 3 | Aspergillus niger contig An15c0100, genomic contig (EC 1.1.3.13)  |
| A0A100IAW6 | 16037 | 9  | 3 | Chitinase                                                         |
| A0A117E3H5 | 10345 | 6  | 3 | EH domain binding protein epsin 2                                 |
| G3XLZ5     | 13459 | 15 | 3 | Uncharacterized protein (Fragment)                                |
| G3YGP4     | 9309  | 6  | 2 | Aldehyde dehydrogenase (EC 1.2.1.3)                               |
| A2Q9J5     | 6576  | 2  | 2 | Aspergillus niger contig An01c0290, genomic contig (EC 4.1.1.21)  |
| A2QBX5     | 9255  | 15 | 2 | Aspergillus niger contig An02c0010, genomic contig (EC 3.4.21.-)  |
| A2QMN7     | 10199 | 8  | 2 | Aspergillus niger contig An07c0070, genomic contig                |
| A2QSI3     | 8992  | 6  | 2 | Aspergillus niger contig An08c0280, genomic contig (EC 1.2.1.3)   |
| A2QYU3     | 9242  | 6  | 2 | Aspergillus niger contig An12c0070, genomic contig (EC 1.3.1.-)   |
| A0A100IJ50 | 11196 | 1  | 2 | Cell wall biogenesis protein phosphatase Ssd1                     |
| A0A117DX85 | 5277  | 10 | 2 | Lectin family integral membrane protein                           |
| A0A100IFU7 | 9654  | 11 | 2 | Ras family protein (Ras-related protein Rab-6A)                   |
| Q078W8     | 9654  | 11 | 2 | Secretion related GTPase C                                        |
| A0A100IFI2 | 6758  | 4  | 2 | Translation initiation factor 4B                                  |
| G3XP29     | 10868 | 3  | 2 | Uncharacterized protein                                           |
| G3Y355     | 10518 | 1  | 2 | Uncharacterized protein (Fragment)                                |
| A0A117E3A2 | 6666  | 2  | 1 | 14-alpha sterol demethylase Cyp51B                                |
| A0A100ICS8 | 5832  | 0  | 1 | 1-phosphatidylinositol-3-phosphate 5-kinase                       |
| A2Q7G2     | 5985  | 2  | 1 | Aspergillus niger contig An01c0030, genomic contig                |
| A2Q9K1     | 5071  | 3  | 1 | Aspergillus niger contig An01c0290, genomic contig (EC 1.1.1.184) |
| A2QBD3     | 8046  | 6  | 1 | Aspergillus niger contig An01c0470, genomic contig                |
| A2QC57     | 4795  | 1  | 1 | Aspergillus niger contig An02c0040, genomic contig (Fragment)     |
| A2QES6     | 4827  | 3  | 1 | Aspergillus niger contig An02c0390, genomic contig                |
| A2QGA4     | 4585  | 4  | 1 | Aspergillus niger contig An03c0070, genomic contig                |
| A2QIK6     | 6057  | 3  | 1 | Aspergillus niger contig An04c0140, genomic contig                |
| A2QMJ4     | 8589  | 5  | 1 | Aspergillus niger contig An07c0050, genomic contig (EC 2.5.1.18)  |

|            |       |    |   |                                                                         |
|------------|-------|----|---|-------------------------------------------------------------------------|
| A2QMP0     | 4712  | 4  | 1 | Aspergillus niger contig An07c0080, genomic contig                      |
| A2QMR9     | 4203  | 0  | 1 | Aspergillus niger contig An07c0080, genomic contig                      |
| A2QQP7     | 3931  | 7  | 1 | Aspergillus niger contig An08c0100, genomic contig                      |
| A2QT31     | 11510 | 3  | 1 | Aspergillus niger contig An09c0030, genomic contig (EC 1.14.13.1)       |
| A2QU00     | 4214  | 6  | 1 | Aspergillus niger contig An09c0100, genomic contig                      |
| A2QUJ9     | 4227  | 3  | 1 | Aspergillus niger contig An09c0180, genomic contig                      |
| A2QW14     | 5173  | 3  | 1 | Aspergillus niger contig An11c0150, genomic contig                      |
| A2QY47     | 5938  | 9  | 1 | Aspergillus niger contig An11c0400, genomic contig                      |
| A2QZJ8     | 6169  | 3  | 1 | Aspergillus niger contig An12c0160, genomic contig                      |
| A2R113     | 5553  | 3  | 1 | Aspergillus niger contig An12c0380, genomic contig (EC 1.-.-)           |
| A2R162     | 7268  | 2  | 1 | Aspergillus niger contig An13c0010, genomic contig (EC 1.14.14.-)       |
| A2R2K2     | 9417  | 3  | 1 | Aspergillus niger contig An14c0030, genomic contig (Fragment)           |
| A2R2M7     | 6856  | 4  | 1 | Aspergillus niger contig An14c0060, genomic contig (EC 1.-.-)           |
| A2R359     | 4522  | 1  | 1 | Aspergillus niger contig An14c0130, genomic contig                      |
| A2R447     | 6662  | 0  | 1 | Aspergillus niger contig An14c0190, genomic contig (Fragment)           |
| A2R455     | 7921  | 10 | 1 | Aspergillus niger contig An14c0200, genomic contig                      |
| A2R4Z4     | 6067  | 0  | 1 | Aspergillus niger contig An15c0100, genomic contig (EC 2.1.1.-)         |
| A2R5T3     | 6381  | 3  | 1 | Aspergillus niger contig An15c0190, genomic contig                      |
| A2RAX5     | 6911  | 1  | 1 | Aspergillus niger contig An18c0160, genomic contig                      |
| A2RAX9     | 5496  | 1  | 1 | Aspergillus niger contig An18c0160, genomic contig                      |
| A0A117E1A8 | 6650  | 3  | 1 | BAR adaptor protein RVS167                                              |
| A0A100I6D3 | 4228  | 0  | 1 | Chitin synthase ChsE                                                    |
| A0A100IME7 | 7402  | 6  | 1 | Citrate and oxoglutarate carrier protein (DNA replication protein YHM2) |
| G3Y702     | 4341  | 13 | 1 | Cyclin-dependent kinases regulatory subunit                             |
| G3XT55     | 4950  | 3  | 1 | Dehydrogenase                                                           |
| A0A100IU38 | 4540  | 1  | 1 | DNA-binding protein HGH1                                                |
| A0A100IFR6 | 6580  | 5  | 1 | DUF92 domain protein                                                    |
| A0A100I6B8 | 3970  | 1  | 1 | Exocyst complex component Exo70                                         |

|            |       |    |   |                                                                                                                                                                                                                                                                                                             |
|------------|-------|----|---|-------------------------------------------------------------------------------------------------------------------------------------------------------------------------------------------------------------------------------------------------------------------------------------------------------------|
| G3XWH2     | 3658  | 3  | 1 | Ferulic acid decarboxylase 1 (EC 4.1.1.102) (Phenacrylate decarboxylase)                                                                                                                                                                                                                                    |
| A0A100ITN0 | 58,85 | 2  | 1 | Flavin-binding monooxygenase                                                                                                                                                                                                                                                                                |
| Q5F4N6     | 6938  | 2  | 1 | Flavo-hemoglobin                                                                                                                                                                                                                                                                                            |
| A0A100I3C3 | 5537  | 2  | 1 | Glutathione transferase                                                                                                                                                                                                                                                                                     |
| A0A100IUZ3 | 6257  | 17 | 1 | Import inner membrane translocase subunit TIM9 (Tim10/DDP family zinc finger family protein)                                                                                                                                                                                                                |
| A0A124BY48 | 6108  | 1  | 1 | LMBR1 domain protein                                                                                                                                                                                                                                                                                        |
| A0A117E0V4 | 4096  | 4  | 1 | L-PSP endoribonuclease family protein                                                                                                                                                                                                                                                                       |
| A0A100IJX6 | 3908  | 8  | 1 | LSM domain family protein (Small nuclear ribonucleoprotein Sm D2)                                                                                                                                                                                                                                           |
| A0A124BW51 | 5762  | 9  | 1 | LSM domain family protein (Small nuclear ribonucleoprotein SmD3)                                                                                                                                                                                                                                            |
| A0A117E2F8 | 6766  | 1  | 1 | MFS transporter                                                                                                                                                                                                                                                                                             |
| A0A100IMC6 | 4149  | 3  | 1 | Mitochondrial fusion protein                                                                                                                                                                                                                                                                                |
| P05328     | 5687  | 2  | 1 | Multifunctional tryptophan biosynthesis protein [Includes: Anthranilate synthase component 2 (AS) (EC 4.1.3.27) (Anthranilate synthase, glutamine amidotransferase component); Indole-3-glycerol phosphate synthase (IGPS) (EC 4.1.1.48); N-(5'-phosphoribosyl)anthranilate isomerase (PRAI) (EC 5.3.1.24)] |
| A0A100I973 | 10135 | 3  | 1 | NADH oxidase                                                                                                                                                                                                                                                                                                |
| G3XZG5     | 3794  | 2  | 1 | NADH:flavin oxidoreductase                                                                                                                                                                                                                                                                                  |
| G3XW35     | 3442  | 0  | 1 | Non-ribosomal peptide synthetase                                                                                                                                                                                                                                                                            |
| A0A100IL69 | 5865  | 5  | 1 | Nuclear transport factor 2                                                                                                                                                                                                                                                                                  |
| A0A100IJE3 | 4125  | 1  | 1 | Patched sphingolipid transporter                                                                                                                                                                                                                                                                            |
| A0A100I3A5 | 7972  | 4  | 1 | Phosphatidyl synthase                                                                                                                                                                                                                                                                                       |
| A0A100I3L3 | 3733  | 1  | 1 | Phosphoribosylaminoimidazole carboxylase                                                                                                                                                                                                                                                                    |
| A0A100ISL2 | 3763  | 0  | 1 | Polyketide synthase                                                                                                                                                                                                                                                                                         |
| A0A100IQ55 | 4532  | 5  | 1 | Seryl-tRNA synthetase                                                                                                                                                                                                                                                                                       |
| A0A117DZC7 | 4295  | 1  | 1 | Similar to An15g02770                                                                                                                                                                                                                                                                                       |
| A0A124BZ28 | 3665  | 2  | 1 | Sulfite reductase                                                                                                                                                                                                                                                                                           |



|            |       |   |   |                                                                                                 |
|------------|-------|---|---|-------------------------------------------------------------------------------------------------|
| A0A100IT00 | 4151  | 3 | 1 | Tetratricopeptide repeat domain protein                                                         |
| A0A100I5N0 | 12061 | 3 | 1 | Translation initiation factor eIF-2B subunit family protein                                     |
| A2QP99     | 3486  | 3 | 1 | Trehalose-6-phosphate synthase (EC 2.4.1.15) (UDP-glucose-glucosephosphate glucosyltransferase) |
| A0A100IR20 | 5157  | 6 | 1 | TrkA-N domain dehydrogenase                                                                     |
| A0A124BVK0 | 3456  | 0 | 1 | tRNA processing endoribonuclease Trz1                                                           |
| A0A117DWN1 | 4953  | 6 | 1 | Ubiquitin conjugating enzyme                                                                    |
| A0A100I6G1 | 9169  | 1 | 1 | Uncharacterized protein                                                                         |
| A0A100IG69 | 6281  | 3 | 1 | Uncharacterized protein                                                                         |
| A0A100ILR8 | 5928  | 4 | 1 | Uncharacterized protein                                                                         |
| A0A100IQA7 | 11002 | 2 | 1 | Uncharacterized protein                                                                         |
| A0A100IUH7 | 4839  | 1 | 1 | Uncharacterized protein                                                                         |
| A2QR37     | 10225 | 6 | 1 | Uncharacterized protein                                                                         |
| G3XLR0     | 4443  | 3 | 1 | Uncharacterized protein                                                                         |
| G3XM24     | 5785  | 6 | 1 | Uncharacterized protein                                                                         |
| G3XMP2     | 5877  | 2 | 1 | Uncharacterized protein                                                                         |
| G3XRI8     | 5816  | 2 | 1 | Uncharacterized protein                                                                         |
| G3XTP0     | 5433  | 7 | 1 | Uncharacterized protein                                                                         |
| G3XW01     | 3764  | 4 | 1 | Uncharacterized protein                                                                         |
| G3XW65     | 4766  | 3 | 1 | Uncharacterized protein                                                                         |
| G3XWJ2     | 5252  | 2 | 1 | Uncharacterized protein                                                                         |
| G3XXU4     | 5476  | 0 | 1 | Uncharacterized protein                                                                         |
| G3Y528     | 5279  | 6 | 1 | Uncharacterized protein                                                                         |
| G3Y6V8     | 5121  | 4 | 1 | Uncharacterized protein                                                                         |
| G3Y7G1     | 4791  | 1 | 1 | Uncharacterized protein                                                                         |
| G3YCH9     | 6051  | 5 | 1 | Uncharacterized protein                                                                         |
| G3YDW1     | 5299  | 6 | 1 | Uncharacterized protein                                                                         |
| G3YFA3     | 3734  | 4 | 1 | Uncharacterized protein                                                                         |

|        |      |   |   |                                    |
|--------|------|---|---|------------------------------------|
| G3Y164 | 3598 | 2 | 1 | Uncharacterized protein (Fragment) |
| G3Y2V8 | 5003 | 1 | 1 | Uncharacterized protein (Fragment) |
| G3Y377 | 9939 | 2 | 1 | Uncharacterized protein (Fragment) |
| G3Y8E7 | 5167 | 2 | 1 | Uncharacterized protein (Fragment) |
| G3YG09 | 6732 | 2 | 1 | Uncharacterized protein (Fragment) |
